# Supplementary material for: Acid cleavable PEG-lipids for applications in a ternary gene delivery vector
Source: Royal Society of Chemistry journal article supplement (doi:10.1039/b719782a), 2008-04-15
Supplement: b719782a.pdf [file b719782a.pdf]

## Supporting Information

### Acid Cleavable PEG-lipids for Applications in a Ternary Gene Delivery Vector

John B. Wong,<sup>a</sup> Stephanie Grosse,<sup>b</sup> Alethea B. Tabor,<sup>a</sup> Stephen L. Hart,<sup>b</sup> and Helen C. Hailes\*<sup>a</sup>

<sup>a</sup> Department of Chemistry, University College London, 20 Gordon Street, London, WC1H 0AJ, UK. . Fax: +44 20 7679 7463; Tel: +44 20 7679 4654; E-mail: [h.c.hailes@ucl.ac.uk](mailto:h.c.hailes@ucl.ac.uk)

<sup>b</sup> Molecular Immunology Unit, Institute of Child Health, University College London, 30 Guilford Street, London WC1N 1EH, UK

#### Contents

**Fig 1: Transfection data comparing performance of lipids to Lipofectin™**

**S2**

(a) 16HBE14o-

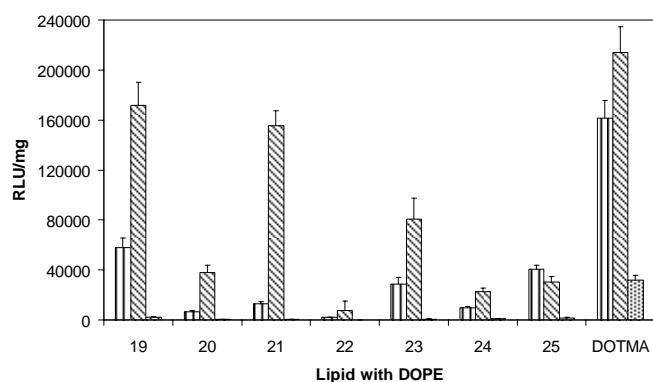

(b) bEND.3

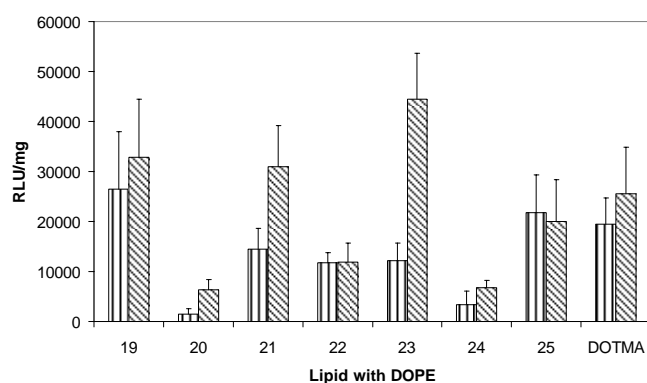

(c) PVSMCs

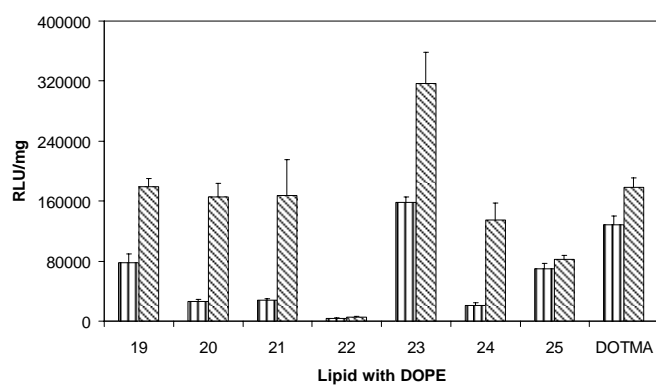

**Fig 1.** Transfections with LID or LD complexes were performed in (a) human bronchial epithelial cells, 16HBE14o-, (b) mouse endothelial cells, bEND.3, (c) primary porcine vascular smooth muscle cells, PVSMCs. The Lipofectin (DOTMA + DOPE) formulation is labelled as DOTMA. Complexes were prepared with DOTMA or a pH-sensitive lipid/DOPE:peptide **3** (stripes) or **26** (diagonal lines) or none (filled, (a) only);pCI-Luc weight ratio of 2:4:1. Transfection incubation was performed for 4 h and luciferase activity was measured 24 h later. The relative light units (RLU) measured for 10 sec are expressed as means  $\pm$  s.e.m. per mg of protein.
